# Supplementary material
Source: publisher figshare collection journal article supplement (https://sage.figshare.com/ndownloader/files/13724030)
Supplement: Supplementary file 1 [file 13724030]

# Codebook for Women Politicians, Institutions, and Perceptions of Corruption

## *Comparative Political Studies*

Tiffany D. Barnes and Emily Beaulieu

| Variable Name | Variable Description                                                                                                                                                                                                                                                                                                                                                                                                                                                                                             |
|---------------|------------------------------------------------------------------------------------------------------------------------------------------------------------------------------------------------------------------------------------------------------------------------------------------------------------------------------------------------------------------------------------------------------------------------------------------------------------------------------------------------------------------|
| male_honest   | =1 if respondent received the “Honest Male” treatment; 0 otherwise                                                                                                                                                                                                                                                                                                                                                                                                                                               |
| fem_honest    | =1 if respondent received the “Honest Female” treatment; 0 otherwise                                                                                                                                                                                                                                                                                                                                                                                                                                             |
| fem_risk      | =1 if respondent received the “Risk Adverse Female” treatment; 0 otherwise                                                                                                                                                                                                                                                                                                                                                                                                                                       |
| male_risk     | =1 if respondent received the “Risk Adverse Male” treatment; 0 otherwise                                                                                                                                                                                                                                                                                                                                                                                                                                         |
| fem_outsider  | =1 if respondent received the “Marginalized Female” treatment; 0 otherwise                                                                                                                                                                                                                                                                                                                                                                                                                                       |
| male_outsider | =1 if respondent received the “Marginalized Male” treatment; 0 otherwise                                                                                                                                                                                                                                                                                                                                                                                                                                         |
| female        | =1 for female respondents and 0 for male respondents                                                                                                                                                                                                                                                                                                                                                                                                                                                             |
| education     | Codes respondent education range variable ranges from 0-6 indicating the following income ranges:<br>0. Did not graduate from high school<br>1. High school graduate<br>2. Currently in enrolled in college<br>3. Some college, but no degree (not currently enrolled)<br>4. 2-year college degree<br>5. 4-year college degree<br>6. Postgraduate degree (MA, MB, JD, PhD. Ect) (Note: no respondents selected this category)                                                                                    |
| age           | Codes respondent age in years.                                                                                                                                                                                                                                                                                                                                                                                                                                                                                   |
| income        | Codes respondent income range. Variable ranges from 1-15 indicating the following income ranges:<br>1. Less than \$10,000<br>2. \$10,000 - \$14,999<br>3. \$15,000 - \$19,999<br>4. \$20,000 - \$24,999<br>5. \$25,000 - \$29,999<br>6. \$30,000 - \$39,999<br>7. \$40,000 - \$49,999<br>8. \$50,000 - \$59,999<br>9. \$60,000 - \$69,999<br>10. \$70,000 - \$79,999<br>11. \$80,000 - \$99,999<br>12. \$100,000 - \$119,999<br>13. \$120,000 - \$149,999<br>14. \$150,000 to \$249,999<br>15. \$250,000 or more |

|           |                                                                                                                                                                                                                                                                                                                                                          |
|-----------|----------------------------------------------------------------------------------------------------------------------------------------------------------------------------------------------------------------------------------------------------------------------------------------------------------------------------------------------------------|
| fulltime  | =1 if respondent reports working full time; 0 otherwise                                                                                                                                                                                                                                                                                                  |
| parttime  | 1 if respondent reports working part time; 0 otherwise                                                                                                                                                                                                                                                                                                   |
| student   | 1 if respondent reports being a student; 0 otherwise                                                                                                                                                                                                                                                                                                     |
| mh_sex    | Interaction term between Honest Male Treatment and Female Respondent                                                                                                                                                                                                                                                                                     |
| fh_sex    | Interaction term between Honest Female Treatment and Female Respondent                                                                                                                                                                                                                                                                                   |
| fr_sex    | Interaction term between Risk Averse Female Treatment and Female Respondent                                                                                                                                                                                                                                                                              |
| mr_sex    | Interaction term between Risk Averse Male Treatment and Female Respondent                                                                                                                                                                                                                                                                                |
| fo_sex    | Interaction term between Marginalized Female Treatment and Female Respondent                                                                                                                                                                                                                                                                             |
| mo_sex    | Interaction term between Marginalized Male Treatment and Female Respondent                                                                                                                                                                                                                                                                               |
| opp_treat | =1 if respondent received the Female Risk Averse treatment; =2 if respondent received the Male Risk Averse treatment; =3 if respondent received the Female Honest treatment; =4 if respondent received the Male Honest treatment; =5 if respondent received the Female Marginalized treatment; =6 if respondent received the Male Marginalized treatment |
